# Supplementary material
Source: PubMed Central journal article supplement (PMC3028517)

## **Supplemental materials:**

### **Caption for supplementary figures and videos.**

Figure S1. Benign breast tissue with confluent terminal duct lobular units (TDLUs) are difficult to distinguish from invasive carcinoma (Figure 4D). OCT image was reconstructed from ~200 um beneath the tissue surface. OCM image was ~40 um beneath the tissue surface.

Video S1. OCM movie demonstrates normal breast lobules (TDLUs) in 3D. Glandular lumina can be clearly seen as hyposcattering circles. The imaging depth is displayed at the upper left corner of the image.

Video S2. OCM movie demonstrates 3D microstructure of a cyst with apocrine metaplasia. The imaging depth is displayed at the upper left corner of the image.

Video S3. OCM movie demonstrates 3D microstructure of LCIS showing in Figure 6A. The imaging depth is displayed at the upper left corner of the image.

Video S4. OCM movie demonstrates 3D microstructure of LCIS showing in Figure 6B. The imaging depth is displayed at the upper left corner of the image.

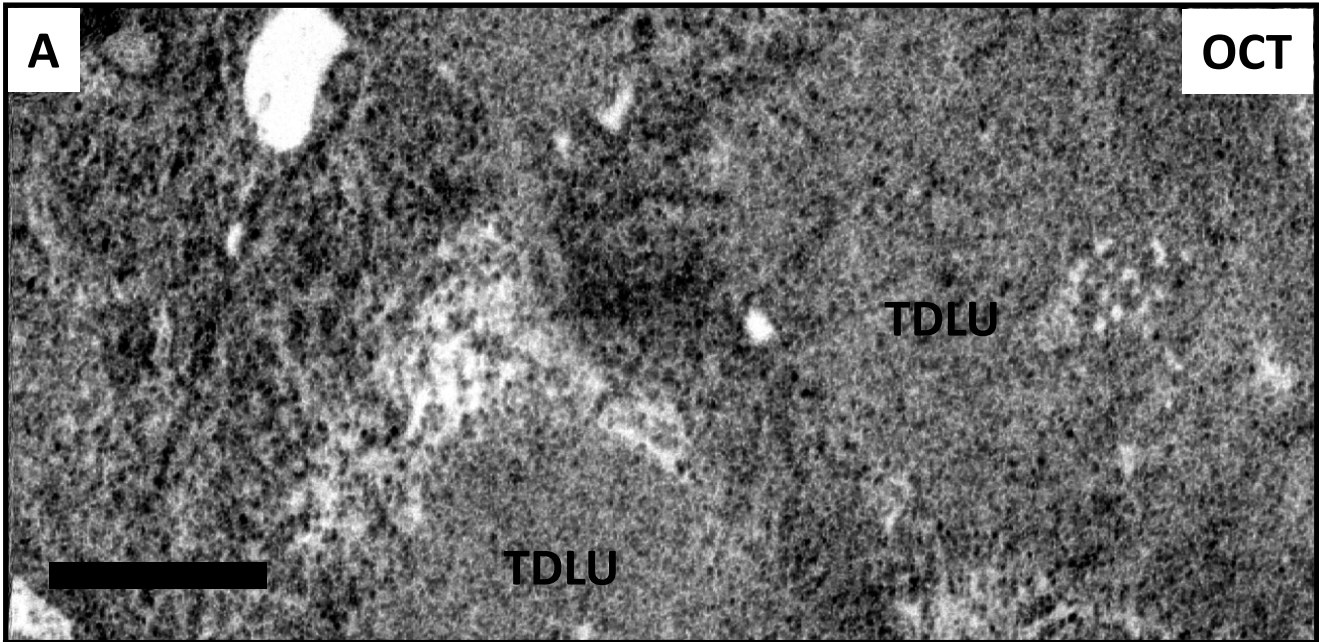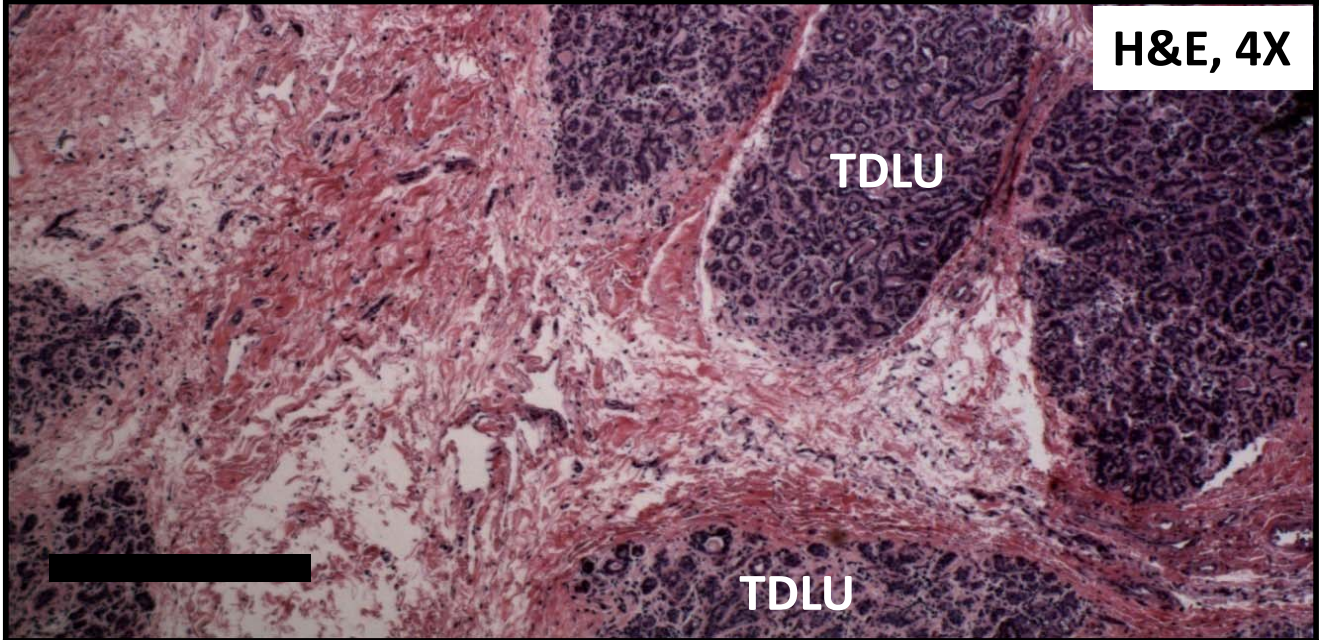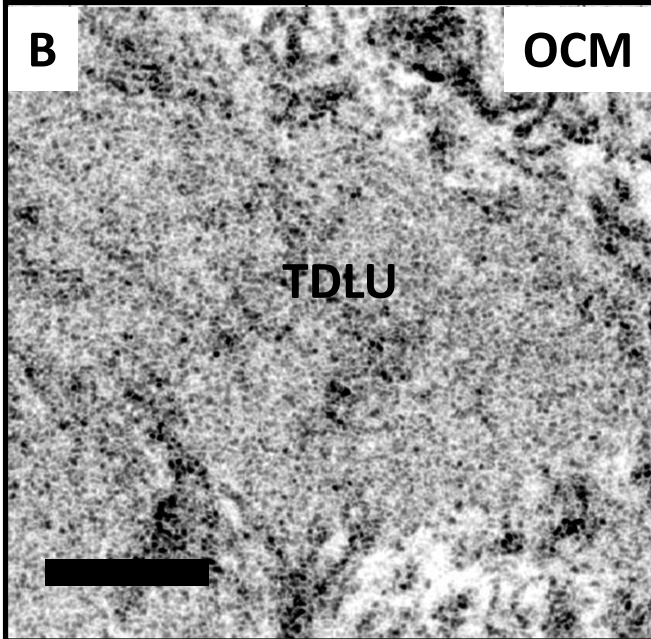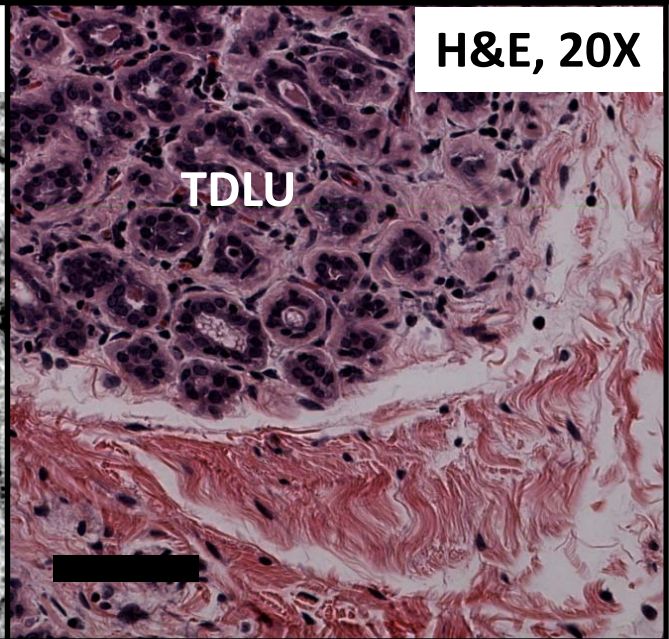

Supplement: NIHMS250436-supplement-1.pdf [file NIHMS250436-supplement-1.pdf]
